# Supplementary material for: PTBP1 drives immune dysfunction and predicts immunotherapy response in metastatic triple-negative breast cancer
Source: Research Square preprint supplement (doi:10.21203/rs.3.rs-7355872/v1), 2025-09-12
Supplement: Supplementary file 1 [file ada220e6467ef70b48ac83f7.pdf]

## Supplementary Figures and Tables

**Title:** PTBP1 drives immune dysfunction and predicts immunotherapy response in metastatic triple-negative breast cancer

**Authors:** Miquel Ensenyat-Mendez, Pere Llinàs-Arias, Javier I.J. Orozco, Andrés F. Bedoya-López, Ayla Manughian-Peter, Betsy Valdez, Sandra Íñiguez-Muñoz, Paula Gonzalez-Ericsson, Matthew P. Salomon, Silvia González-Martínez, Maria Gion, Javier Cortés, Marleen Kok, Maggie L. DiNome, Diego M. Marzese<sup>#</sup>

<sup>#</sup>Correspondence and requests for materials should be addressed to:

Diego M. Marzese ([diego.marzese@duke.edu](mailto:diego.marzese@duke.edu))

**Keywords:** Immunotherapy, RNA splicing, metastatic breast cancer, Triple-negative breast cancer, immune evasion, antigen presentation, immune checkpoint blockade, predictive biomarkers

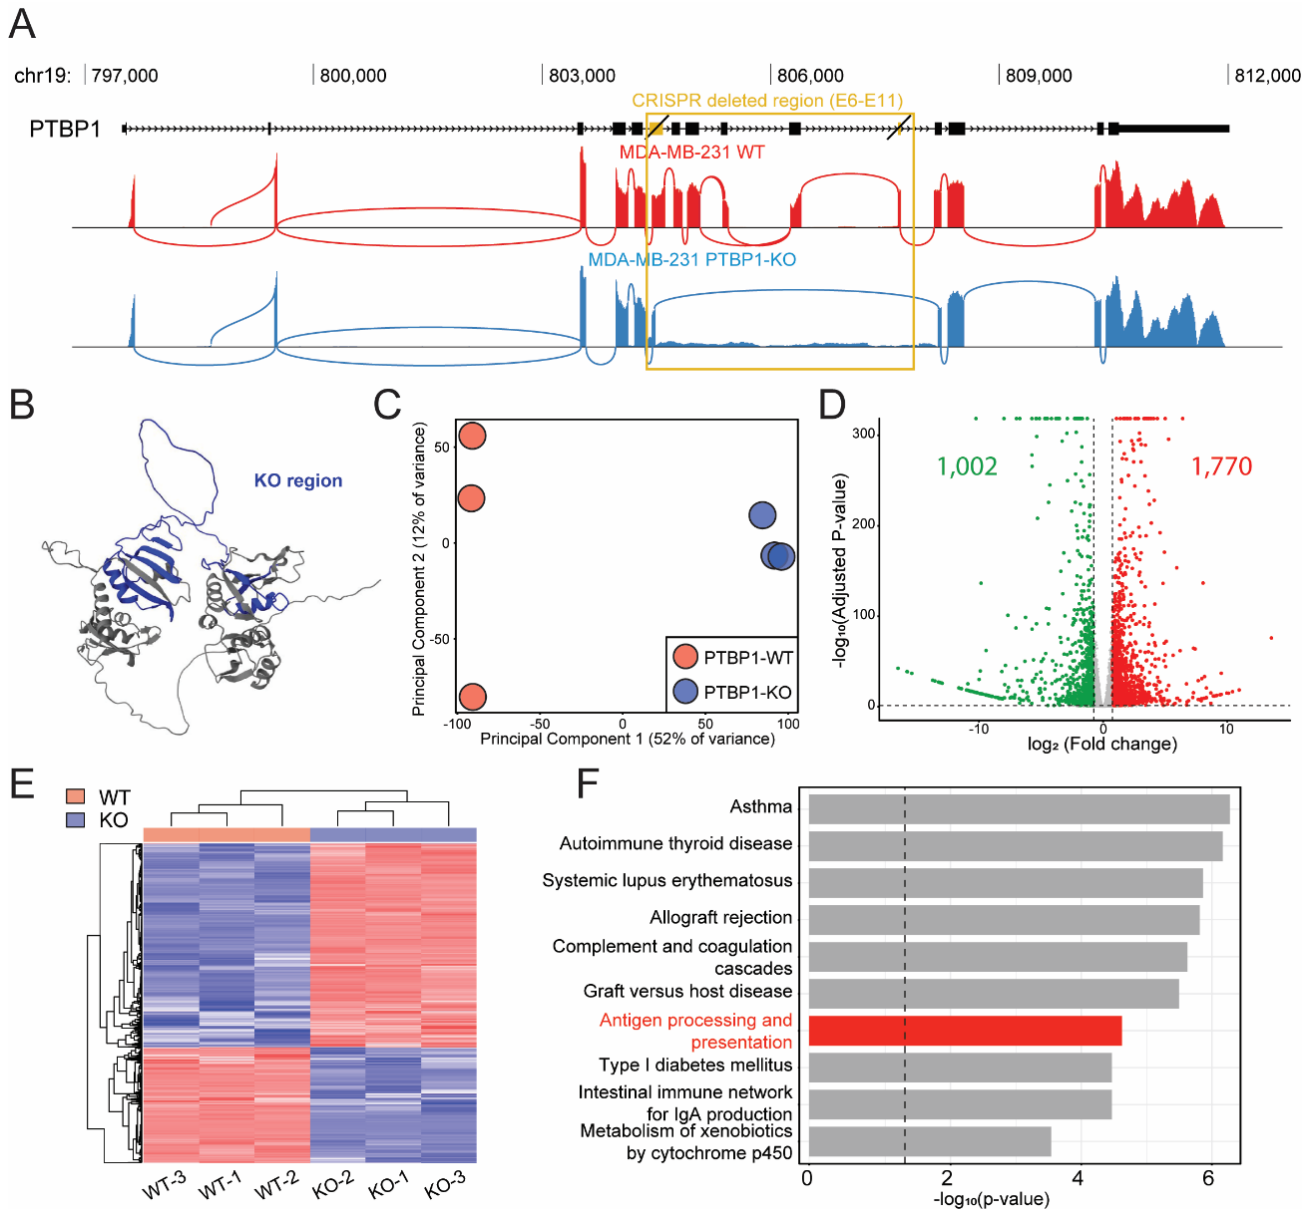

**Supplementary Figure 1: Transcriptomic changes in TNBC cellular model after PTBP1 knockout.** **A)** Sashimi plot representing the PTBP1 CRISPR-based knockout (KO) model. RNA-seq data highlights the depletion of Exons 6 to 11, which are targeted by the CRISPR guides. **B)** PTBP1 structure. Amino acids in the deleted region are highlighted in blue, which includes the four RNA recognition motifs of the protein. **C)** PCA representation of the transcriptome of PTBP1-KO and WT cells, characterized by RNA-seq. **D)** Volcano plot displaying the differentially expressed genes (DEGs) in PTBP1-KO and WT TNBC cells. **E)** Heatmap showing the differential clustering of PTBP1-KO and WT cells according to the DEGs. **F)** Pathway enrichment analysis using the DEGs between PTBP1-KO and WT cells, highlighting the changes in the antigen processing and presentation pathway.

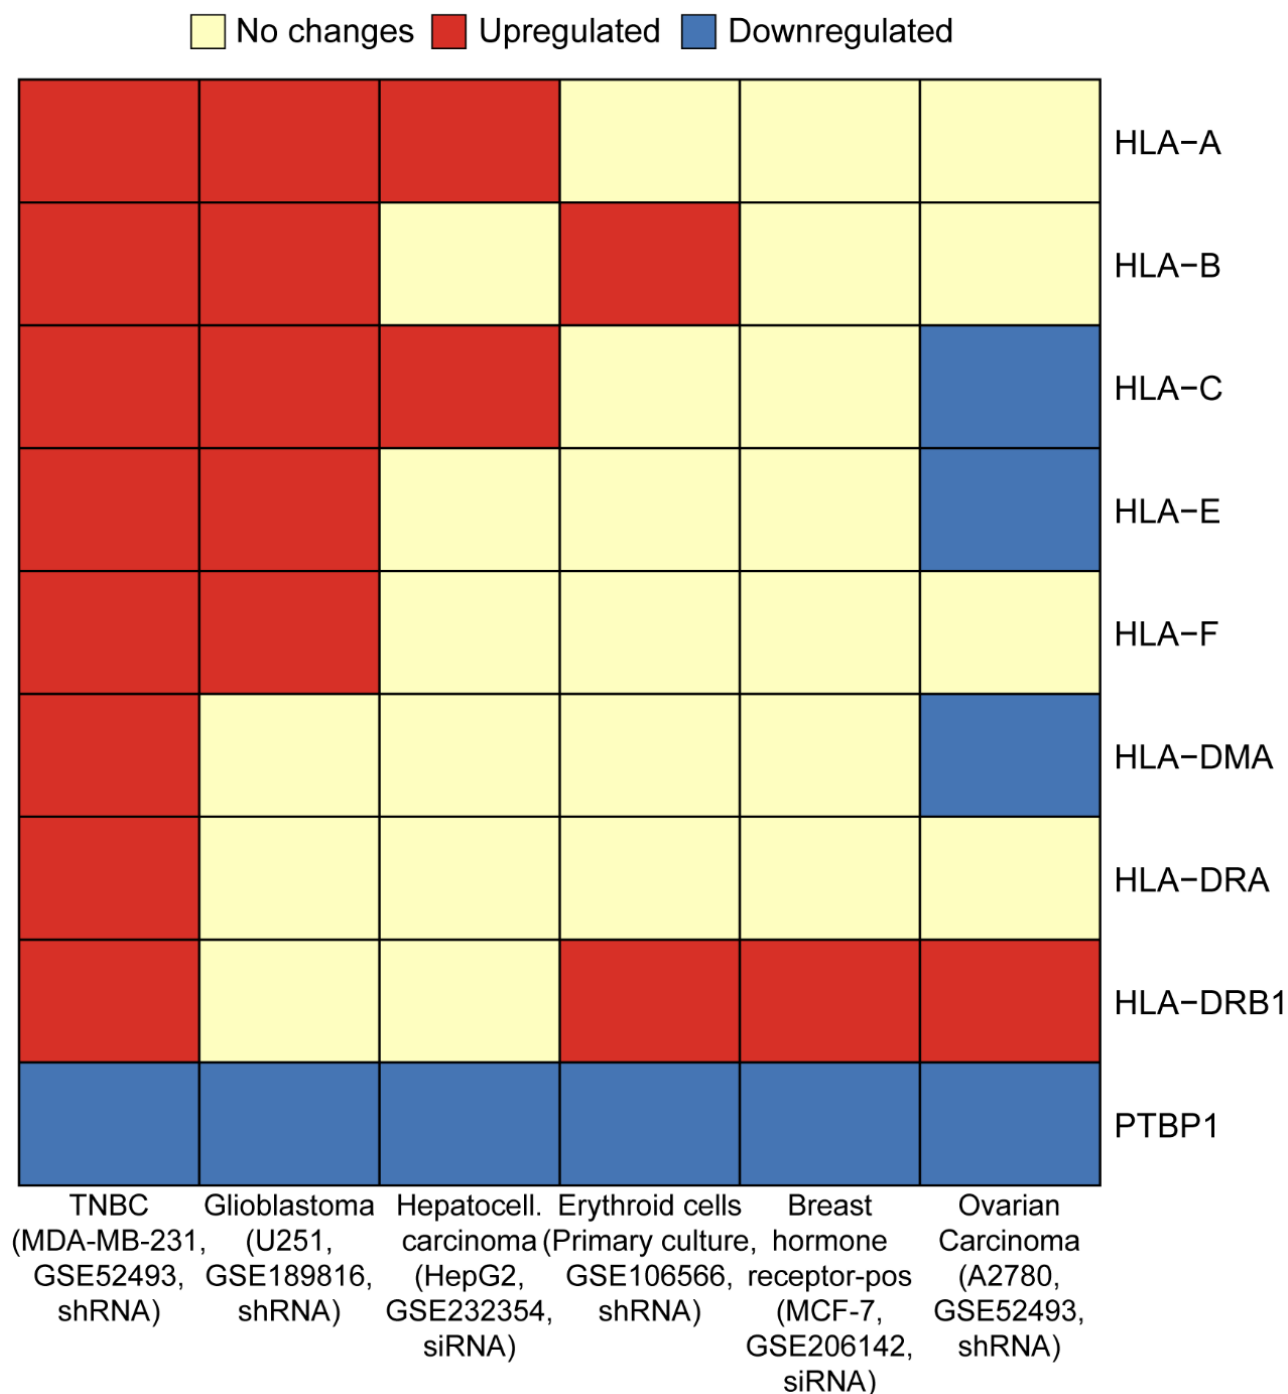

**Supplementary Figure 2: PTBP1 modulates MHC gene expression across different types of cancer.** Heatmap displaying the changes in gene expression of various MHC Class I and Class II genes from different studies disrupting *PTBP1* expression in cancer cells.

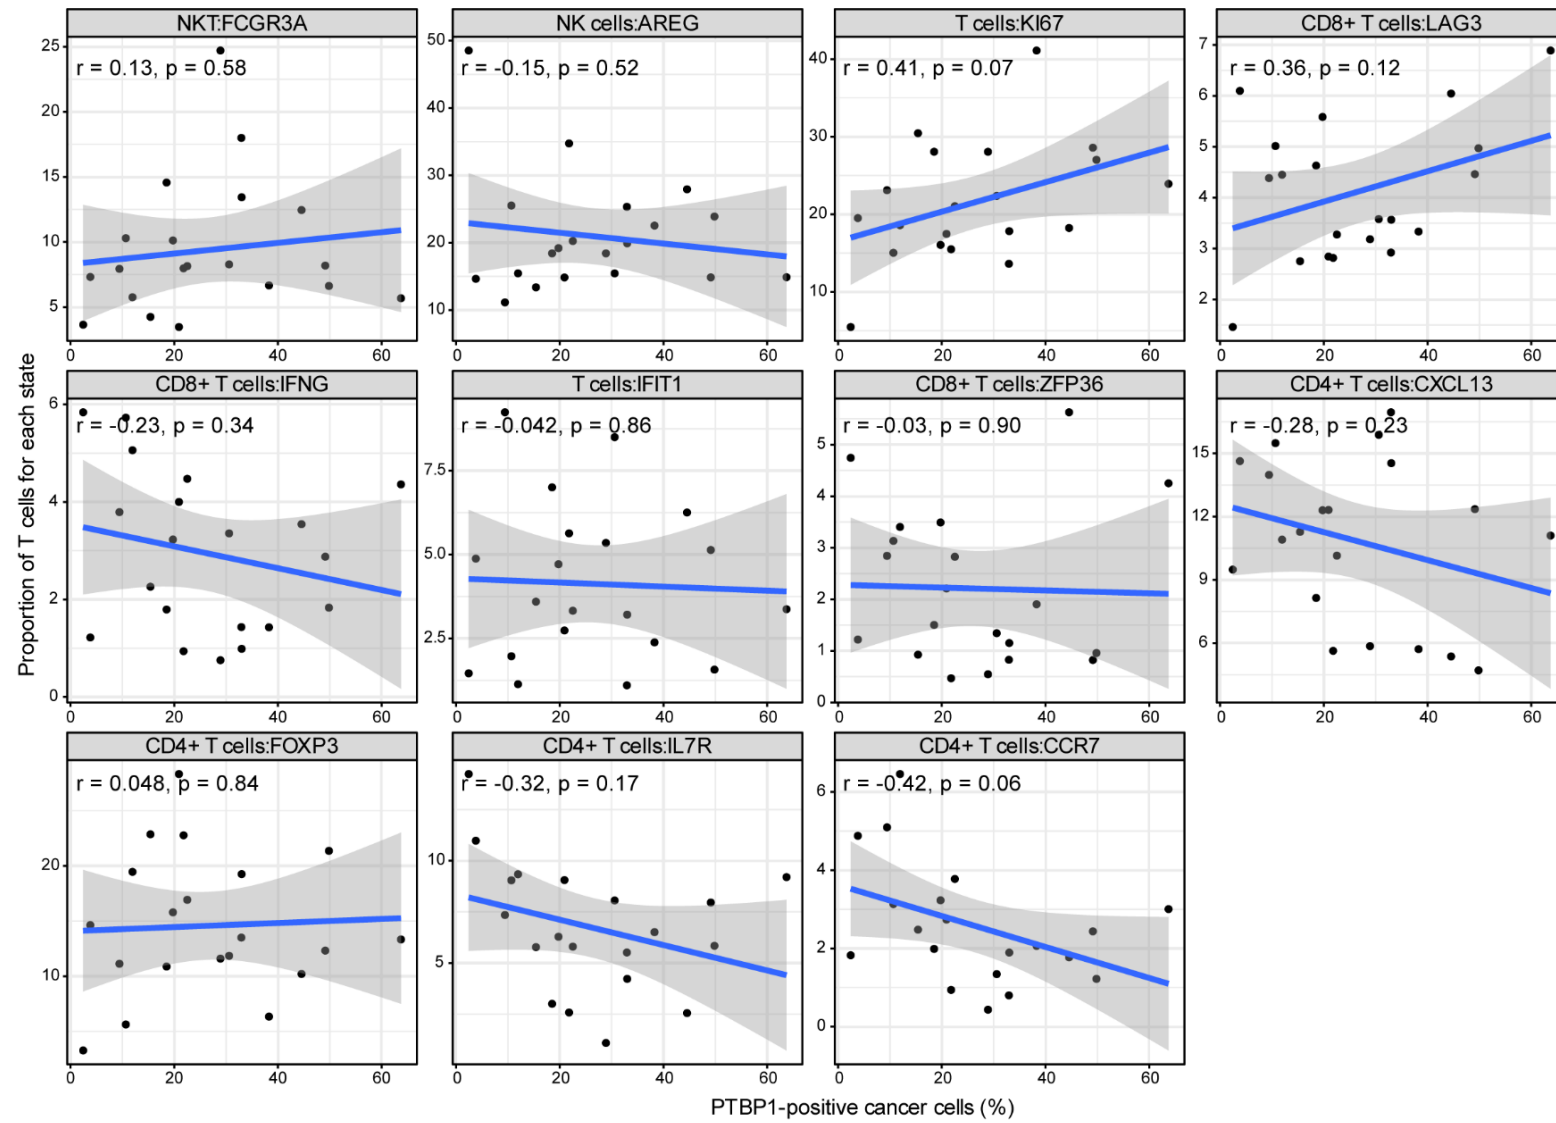

**Supplementary Figure 3: Associations between PTBP1 expression and specific T cell subsets in TNBC tumors.** Correlation analyses between the proportion of PTBP1-positive tumor cells and the abundance of individual T cell subsets associated with several functional states in TNBC tumors in scRNA-seq data.

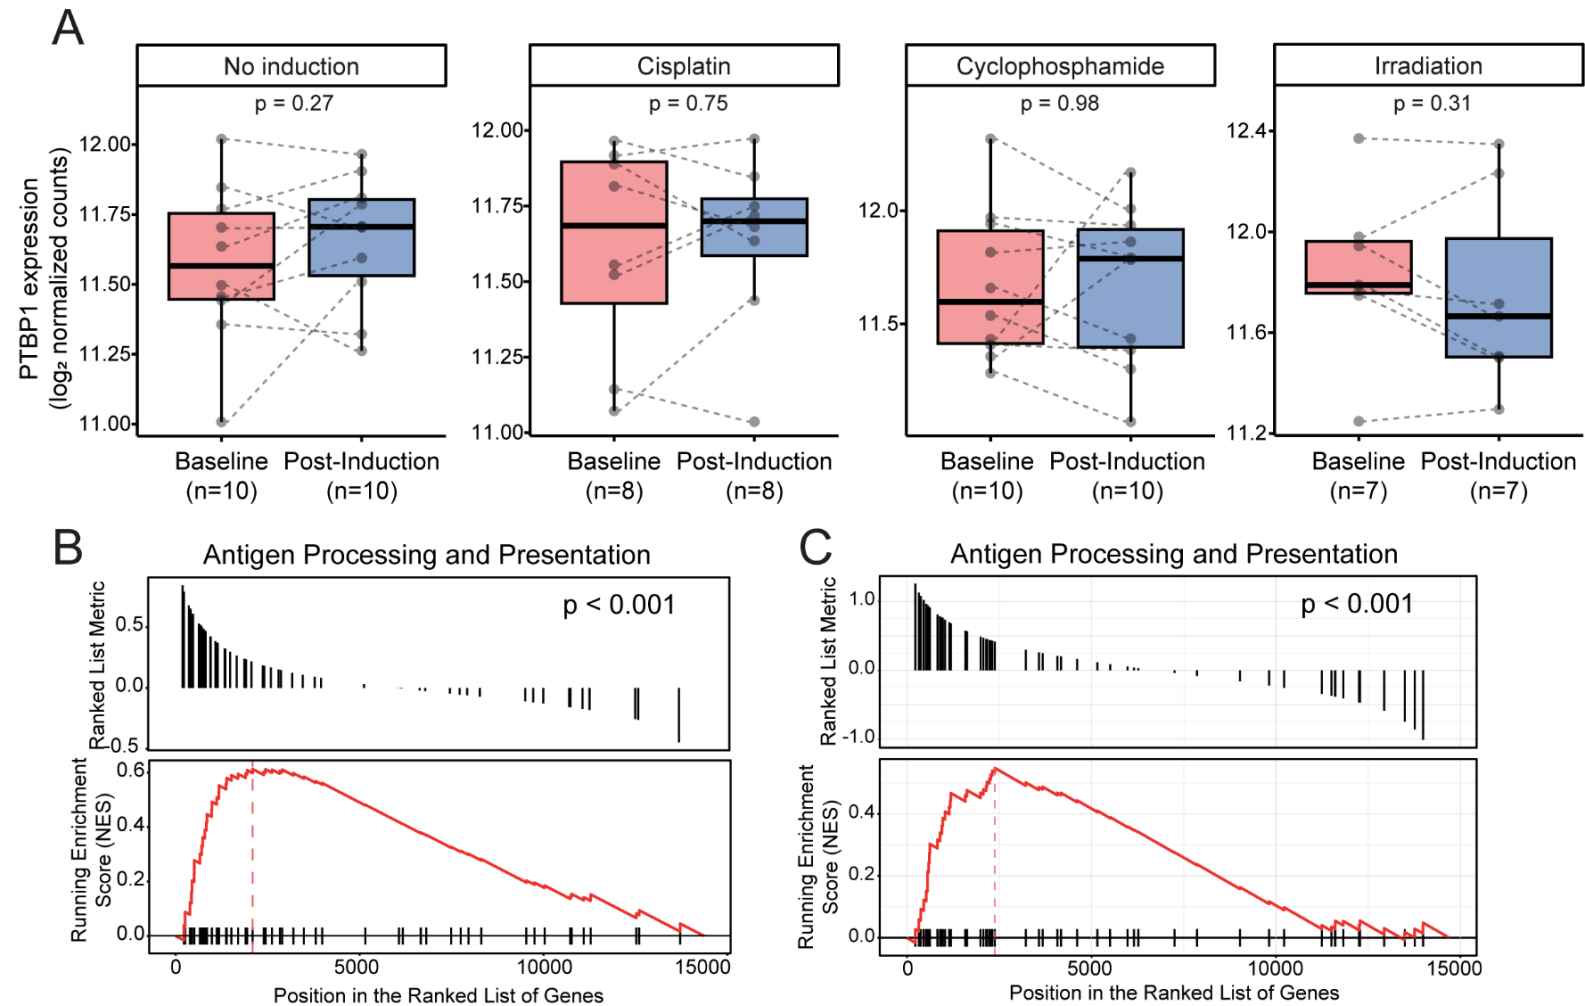

**Supplementary Figure 4: Induction treatments other than doxorubicin do not reduce *PTBP1* expression.** **A)** *PTBP1* expression in paired tumor biopsies before and after induction across non-doxorubicin arms of the TONIC trial. No significant changes in *PTBP1* levels were observed

following cisplatin, cyclophosphamide, or irradiation induction strategies ( $p > 0.05$  for all). **B)** GSEA of antigen processing and presentation pathway in tumors exposed to doxorubicin induction treatment. **C)** GSEA of antigen processing and presentation pathways in tumors from TNBC patients who responded to nivolumab compared to non-responders.

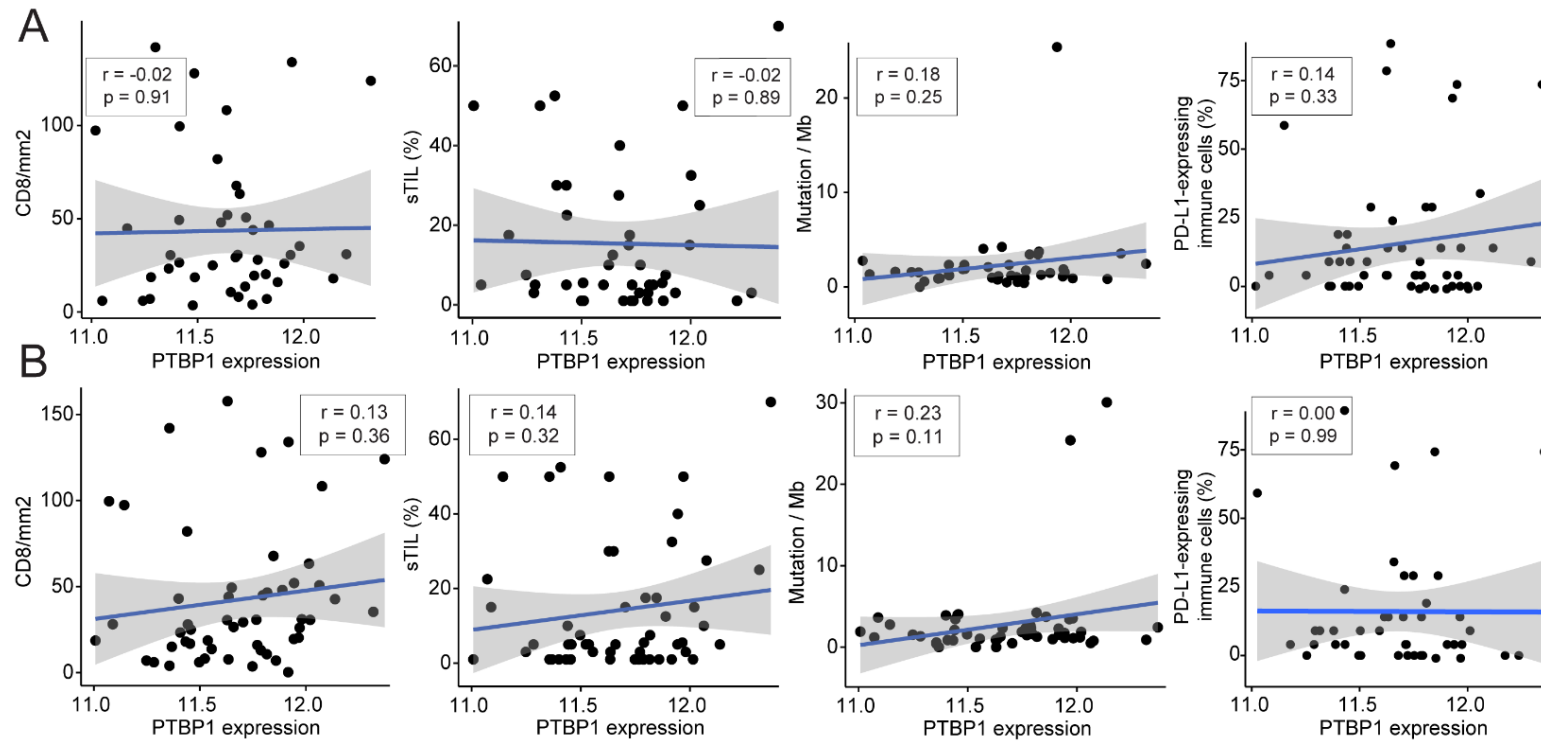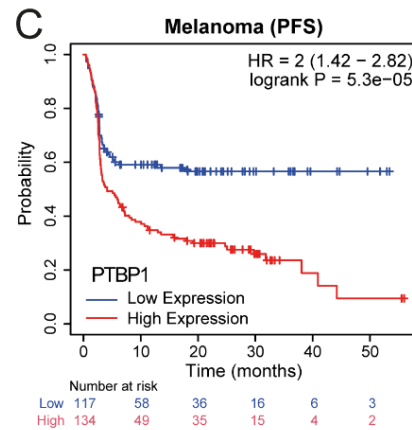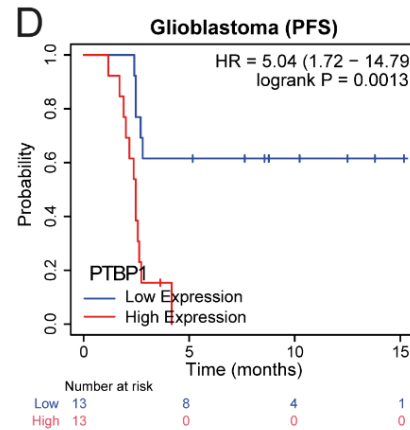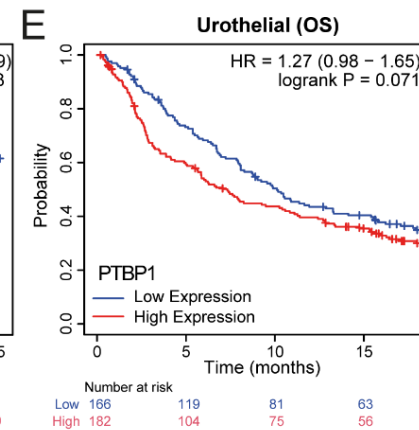



**Supplementary Figure 5: *PTBP1* expression is not associated with conventional immune biomarkers in metastatic TNBC. A-B)** Correlation of **(A)** baseline (up) and **(B)** pre-nivolumab (bottom) *PTBP1* expression with CD8<sup>+</sup> cells per mm<sup>2</sup>, the percentage of TILs, the tumor mutational burden, and the percentage of PD-L1 expressing immune cells in the TONIC clinical trial. **C-D)** Kaplan-Meier analysis of Progression-Free Survival (PFS) in **(C)** melanoma and **(D)** glioblastoma patients treated with IT stratified by *PTBP1* expression levels. **E)** Kaplan-Meier analysis of Overall Survival (OS) in urothelial carcinoma patients treated with IT stratified by *PTBP1* expression levels.

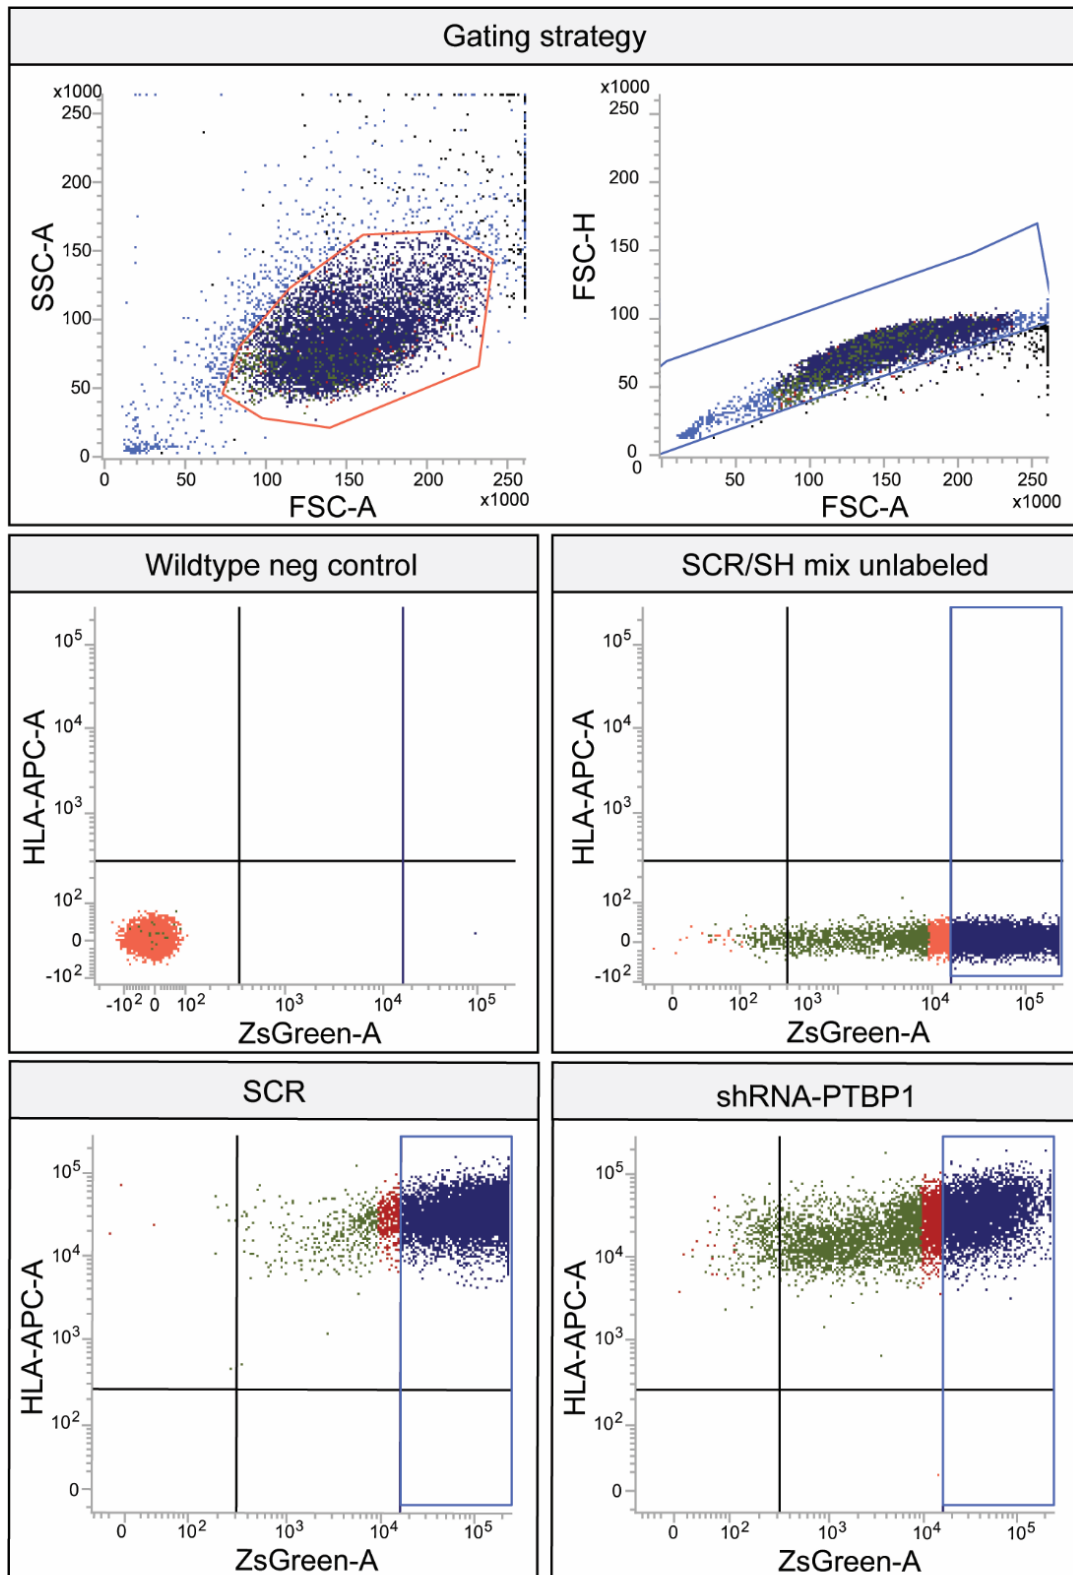

**Supplementary Figure 6**

**Supplementary Figure 6: Gating strategy used in the flow cytometry analysis to analyze HLA expression.** For the cells in the knockdown model, green cells were selected as the 10% of cells with the highest ZsGreen fluorescence.

**Supplementary Table 1.** List of study cohorts and databases, including clinical specimens analyzed in the study, with accession codes and number of patients.

| <b>Cohort</b> | <b>Accession Code</b>         | <b>Total Samples</b> | <b>Total TNBC</b> | <b>Total TNBC after filtering</b> |
|---------------|-------------------------------|----------------------|-------------------|-----------------------------------|
| TCGA-BRCA     | Genomic Data Commons portal   | 1009                 | 152               | 95                                |
| SCAN-B        | doi:<br>10.17632/yzxtxn4nmd.4 | 9206                 | 778               | 655                               |
| AURORA-US     | GSE209998                     | 129                  | 52                | 52                                |
| NCT03366844   | GSE246613                     | 36                   | 36                | 20                                |
| TONIC         | NA (DTA)                      | 54                   | 54                | 53                                |
| I-SPY2        | GSE173839; GSE194040          | 140                  | 90                | 50                                |

**Supplementary Table 2.** Sequence of nucleic acids used across the project.

| Primer name<br>(application) | Sequence                                                                                                                           |
|------------------------------|------------------------------------------------------------------------------------------------------------------------------------|
| SCR_S (KD)                   | gatccCGCAGAACAAATTCGTCCATTCAAGAGATGGACGAATTTGTTC<br>TGCGTTTTTTACGCGTg                                                              |
| SCR_AS (KD)                  | aattcACGCGTAAAAAACGCAGAACAAATTCGTCCATCTCTTGAATGG<br>ACGAATTTGTTCTGCGg                                                              |
| shRNA-<br>PTBP1_S<br>(KD)    | gatccGCACAGTGTTGAAGATCATTTCAAGAGAATGATCTTCAACACT<br>GTGCTTTTTTACGCGTg                                                              |
| shRNA-<br>PTBP1_AS<br>(KD)   | aattcACGCGTAAAAAAGCACAGTGTTGAAGATCATTCTCTTGAAATG<br>ATCTTCAACACTGTGCg                                                              |
| PTBP1_Fd<br>(qPCR)           | CAAGTTCGGCACAGTGTTGA                                                                                                               |
| PTBP1_Rv<br>(qPCR)           | TACTTGACGTTGAGGCTGGT                                                                                                               |
| SDHA_Fd<br>(qPCR)            | TCAGCATGCAGAAGTCAAT                                                                                                                |
| SDHA_RV<br>(qPCR)            | GAACGTCTTCAGGTGCTTT                                                                                                                |
| sgPTBP1_Ex<br>6 (KO)         | GCGGUGAACUCGGUCCAGUC <u>GUUUUAGAGCUAGAAAUAGCAAGU</u><br><u>UAAAAUAAGGCUAGUCCGUU</u><br><u>AUCAACUUGAAAAAGUGGCACCGAGUCGGUGCUUUU</u> |
| sgPTBP1_Ex<br>11(KO)         | GCCGUCCGCCAUCUGCACUAG <u>UUUUAGAGCUAGAAAUAGCAAGU</u><br><u>UAAAAUAAGGCUAGUCCGUU</u><br><u>AUCAACUUGAAAAAGUGGCACCGAGUCGGUGCUUUU</u> |

KD: knockdown, KO: CRISPR-mediated knockout. Lower case bases in KD primers generate restriction enzyme-compatible cohesive ends. Underlined bases in KO primers correspond to sgRNA scaffold.
